# Supplementary material
Source: PubMed Central journal article supplement (PMC6781170)
Supplement: 41437_2018_179_MOESM1_ESM.pdf [file 41437_2018_179_MOESM1_ESM.pdf]

|                                   | VKO1          | VKO2          | VKO3          | VKO4          | VKO5          | VKO6/7/8          | VKO11/12/W on males | VKO17/18/Z on males | VKO11/12/W on females      | VKO17/18/Z on females |
|-----------------------------------|---------------|---------------|---------------|---------------|---------------|-------------------|---------------------|---------------------|----------------------------|-----------------------|
| <i>V. albicularis albicularis</i> | VKO1 on VAA   | VKO2 on VAA   | VKO3 on VAA   | VKO4 on VAA   | VKO5 on VAA   | VKO6/7/8 on VAA   | VKO11/12/W on VAA * | VKO17/18/Z on VAA * | only one individual tested |                       |
| <i>V. exanthematicus</i>          | VKO1 on VEX ♂ | VKO2 on VEX ♂ | VKO3 on VEX ♂ | VKO4 on VEX ♂ | VKO5 on VEX ♂ | VKO6/7/8 on VEX ♂ | VKO11/12/W on VEX ♂ | VKO17/18/Z on VEX ♂ | only male tested           |                       |
| <i>V. prasinus</i>                | VKO1 on VPR ♂ | VKO2 on VPR ♂ | VKO3 on VPR ♂ | VKO4 on VPR ♂ | VKO5 on VPR ♂ | VKO6/7/8 on VPR ♂ | VKO11/12/W on VPR ♂ | VKO17/18/Z on VPR ♂ | VKO11/12/W on VPR ♀        | VKO17/18/Z on VPR ♀   |
| <i>V. ruficollis</i>              | VKO1 on VRU ♂ | VKO2 on VRU ♂ | VKO3 on VRU ♂ | VKO4 on VRU ♂ | VKO5 on VRU ♂ | VKO6/7/8 on VRU ♂ | VKO11/12/W on VRU ♂ | VKO17/18/Z on VRU ♂ | only male tested           |                       |
| <i>V. salvator</i>                | VKO1 on VSA ♀ | VKO2 on VSA ♀ | VKO3 on VSA ♀ | VKO4 on VSA ♀ | VKO5 on VSA ♂ | VKO6/7/8 on VSA ♀ | VKO11/12/W on VSA ♂ | VKO17/18/Z on VSA ♂ | VKO11/12/W on VSA ♀        | VKO17/18/Z on VSA ♀   |
| <i>V. mertensi</i>                | VKO1 on VME ♂ | VKO2 on VME ♂ | VKO3 on VME ♂ | VKO4 on VME ♂ | VKO5 on VME ♂ | VKO6/7/8 on VME ♂ | VKO11/12/W on VME ♂ | VKO17/18/Z on VME ♂ | VKO11/12/W on VME ♀        | VKO17/18/Z on VME ♀   |
| <i>V. panoptes horni</i>          | VKO1 on VPH ♂ | VKO2 on VPH ♂ | VKO3 on VPH ♂ | VKO4 on VPH ♂ | VKO5 on VPH ♂ | VKO6/7/8 on VPH ♂ | VKO11/12/W on VPH ♂ | VKO17/18/Z on VPH ♂ | only male tested           |                       |
| <i>V. glauerti</i>                | VKO1 on VGL ♂ | VKO2 on VGL ♂ | VKO3 on VGL ♂ | VKO4 on VGL ♂ | VKO5 on VGL ♂ | VKO6/7/8 on VGL ♂ | VKO11/12/W on VGL ♂ | VKO17/18/Z on VGL ♂ | VKO11/12/W on VGL ♀        | VKO17/18/Z on VGL ♀   |
| <i>V. acanthurus</i>              | VKO1 on VAC ♂ | VKO2 on VAC ♂ | VKO3 on VAC ♂ | VKO4 on VAC ♂ | VKO5 on VAC ♂ | VKO6/7/8 on VAC ♂ | VKO11/12/W on VAC ♂ | VKO17/18/Z on VAC ♂ | VKO11/12/W on VAC ♀        | VKO17/18/Z on VAC ♀   |
